# Supplementary material for: Overexpression of Arabidopsis thaliana brassinosteroid-related acyltransferase 1 gene induces brassinosteroid-deficient phenotypes in creeping bentgrass
Source: PubMed Central journal article supplement (PMC5662239; doi:10.1371/journal.pone.0187378), 2017-10-30
Supplement: pone.0187378.s002.pdf [file pone.0187378.s002.pdf]

**A**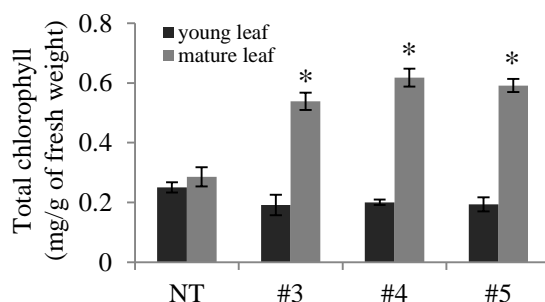**B**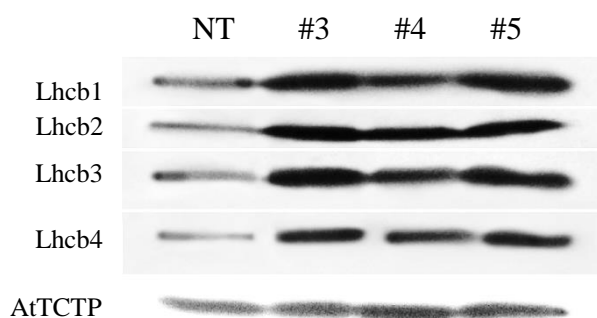

**S2 Fig. Measurement of chlorophyll contents in creeping bentgrass plants.** (A) Chlorophyll contents in young and mature leaves of non-transformed (NT) and transgenic AtBAT1 plants (#3, #4, and #5). Two-week-old leaves were harvested and used as young leaves, and leaves from 4-week-grown plants were used as mature leaves. Data represent means  $\pm$  SD of three independent measurements. Statistically significant changes compared with NT are indicated by \* at  $P < 0.05$ . (B) Western blot analysis of light-harvesting chlorophyll-binding (Lhcb) proteins. Mature leaves were used for this analysis. AtTCTP (*A. thaliana* translationally controlled tumor protein; At3g16640) was shown as loading controls.
